# Supplementary material for: Building an artificial solid electrolyte interphase on spinel lithium manganate for high performance aqueous lithium-ion batteries
Source: Royal Society of Chemistry journal article supplement (doi:10.1039/d0dt00901f), 2020-01-01
Supplement: d0dt00901f1.pdf [file d0dt00901f1.pdf]

## Supporting Information

# Building Artificial Solid Electrolyte Interphase on Spinel Lithium Manganate for High Performance Aqueous Lithium-ion Batteries

Wujie Dong<sup>a§</sup>, Xieyi Huang<sup>a§</sup>, Yan Jin<sup>a</sup>, Miao Xie<sup>a</sup>, Wei Zhao<sup>a</sup>, Fuqiang Huang<sup>a,b\*</sup>

*<sup>a</sup> State Key Laboratory of High Performance Ceramics and Superfine Microstructures, Shanghai Institute of Ceramics, Chinese Academy of Sciences, Shanghai 200050, P.R. China  
State Key*

*<sup>b</sup> Laboratory of Rare Earth Materials Chemistry and Applications, College of Chemistry and Molecular Engineering, Peking University, Beijing 100871, P.R. China*

*Prof. FQ. Huang*

*E-mail: huangfq@mail.sic.ac.cn (FQ. Huang)*

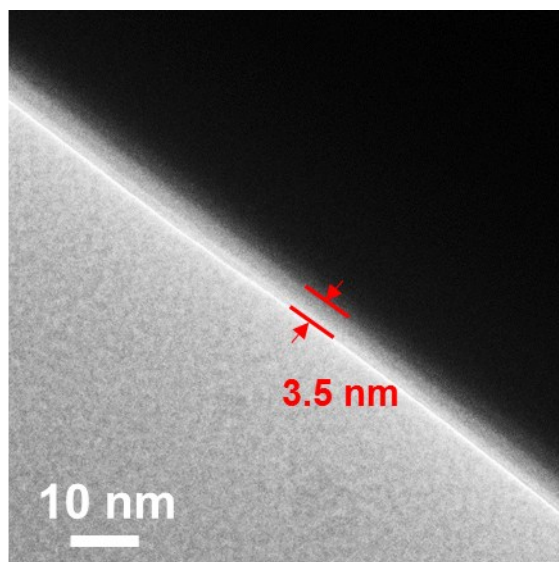

**Figure S1.** Electrochemical in-situ polymerized LiPAA layer on carbon fiber.

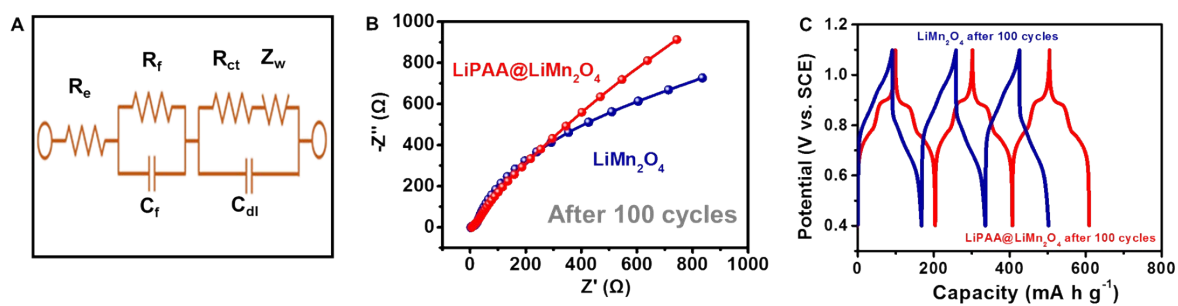

**Figure S2.** (A) The relevant Randles equivalent circuit. (B) Nyquist plots of pristine  $\text{LiMn}_2\text{O}_4$   $\text{LiPAA@LiMn}_2\text{O}_4$  and spanning over 0.01 Hz to  $10^5$  Hz after 100 cycles. (C) GCD curves of  $\text{LiMn}_2\text{O}_4$  and  $\text{LiPAA@LiMn}_2\text{O}_4$  after 100 cycles.

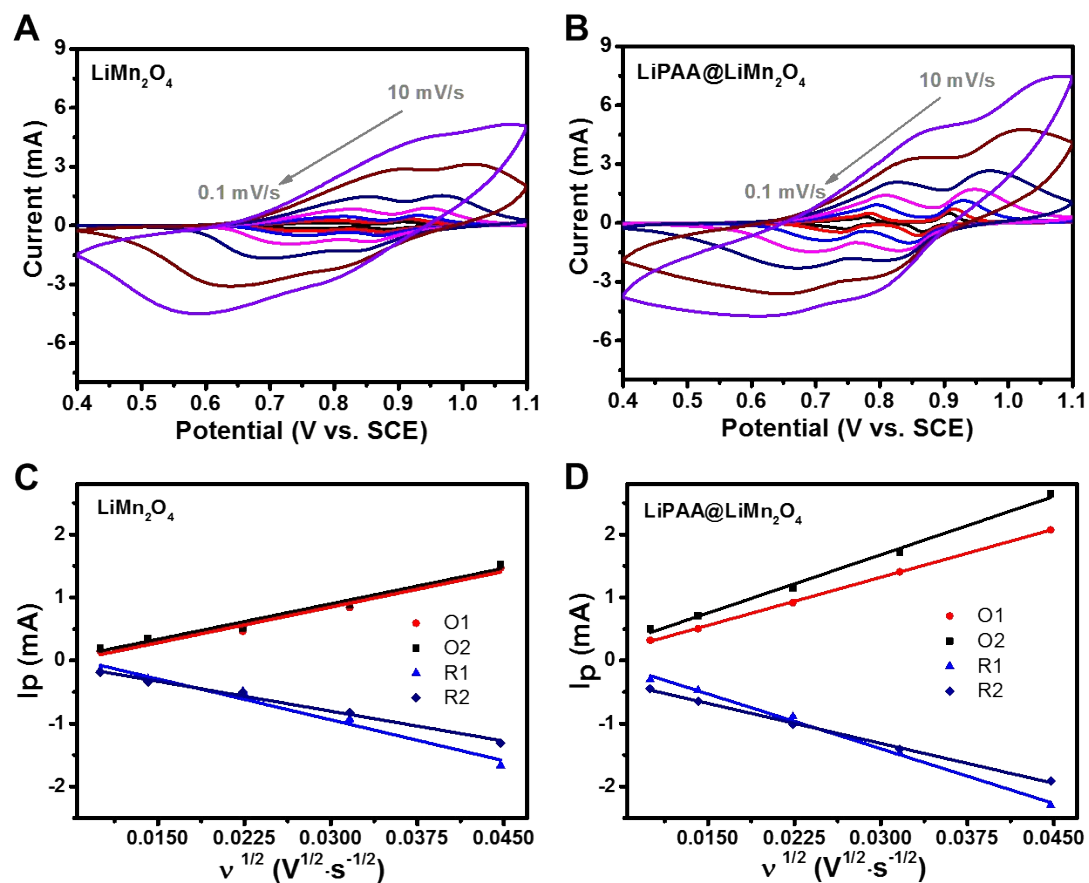

**Figure S3.** CV curves of (A)  $\text{LiMn}_2\text{O}_4$  and (B)  $\text{LiPAA@LiMn}_2\text{O}_4$  electrodes at the scan rate spanning over  $0.1 \text{ mV s}^{-1}$  to  $10 \text{ mV s}^{-1}$ . Plot of peak current ( $I_p$ ) vs. square root of scan rate ( $v^{1/2}$ ) for (C)  $\text{LiMn}_2\text{O}_4$  and (D)  $\text{LiPAA@LiMn}_2\text{O}_4$ .

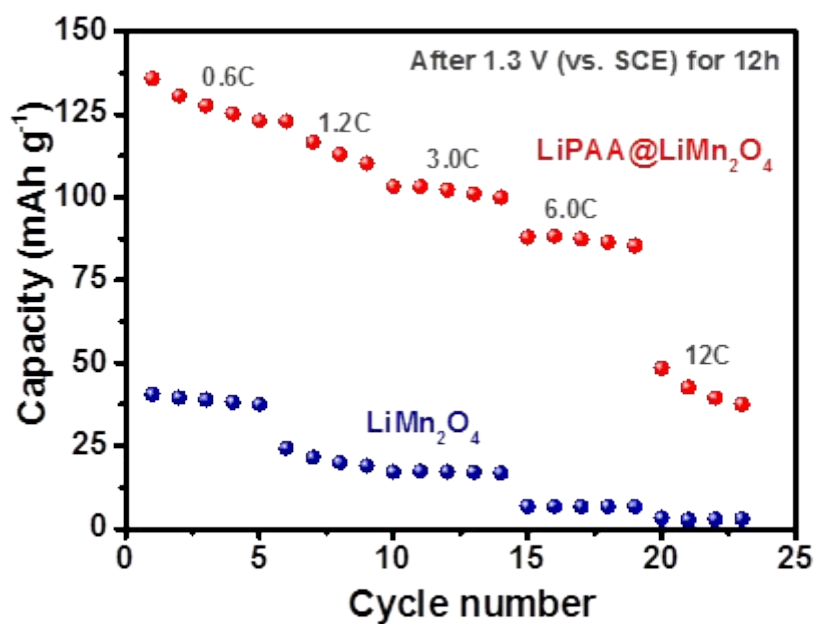

**Figure S4.** Rate performance of LiPAA@LiMn<sub>2</sub>O<sub>4</sub> and LiMn<sub>2</sub>O<sub>4</sub> electrodes spanning before and after holding at 1.3 V (vs. SCE) for 12 h.

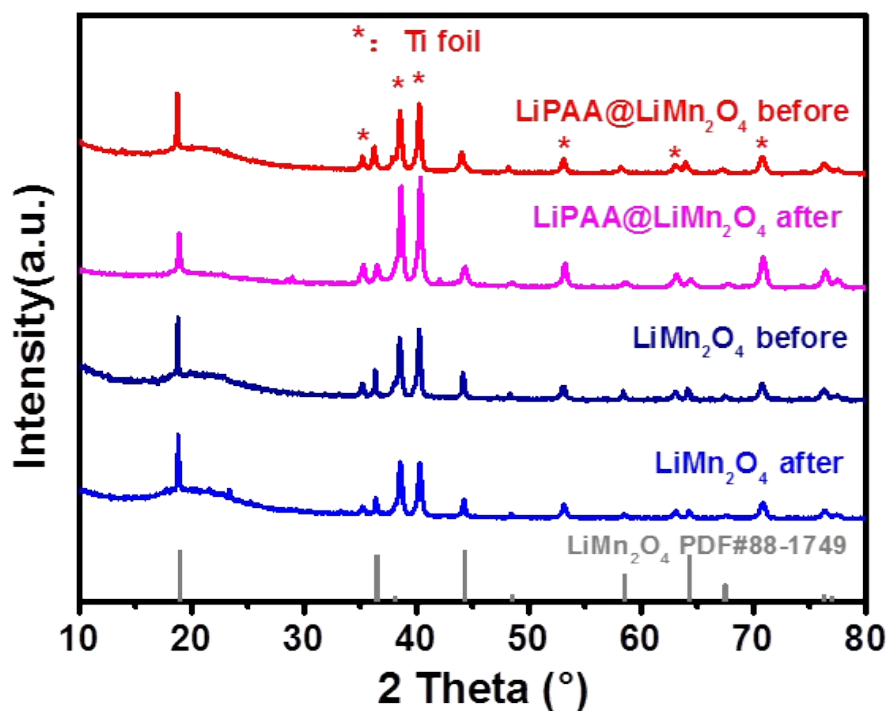

**Figure S5.** *Ex-situ* XRD before and after the overcharged LiPAA@LiMn<sub>2</sub>O<sub>4</sub> and LiMn<sub>2</sub>O<sub>4</sub> electrodes.
